# Supplementary material
Source: publisher figshare collection journal article supplement (https://acs.figshare.com/ndownloader/files/7381585)
Supplement: Supplementary file 1 [file 7381585]

data_global
  
_audit_creation_method            'SHELXL-2014/7' 
# 1. Submission Details

_publ_contact_author_name   'Richard Dronskowski'
_publ_contact_author_address
;
      Institute of Inorganic Chemistry
      RWTH Aachen University
      Landoltweg 1
      52056 Aachen
      Germany
;
_publ_contact_author_email         'drons@HAL9000.ac.rwth-aachen.de'
_publ_contact_author_fax           '0049-241-8092642'
_publ_contact_author_phone         '0049-241-8093642'
_publ_requested_journal            'Inorganic Chemistry'
_publ_requested_category           'Communication'
_publ_requested_coeditor_name      ?
_publ_contact_letter
;
?
;


# 2. Processing Summary (IUCr Office Use Only)

_journal_date_recd_electronic     ?
_journal_date_to_coeditor         ?
_journal_date_from_coeditor       ?
_journal_date_accepted            ?

_journal_date_printers_first      ?
_journal_date_printers_final      ?
_journal_date_proofs_out          ?
_journal_date_proofs_in           ?


_journal_coeditor_name            ?
_journal_coeditor_code            ?
_journal_coeditor_notes
; ?
;

_journal_techeditor_code          ?
_journal_techeditor_notes
; ?
;

_journal_coden_ASTM               ?
_journal_name_full                ?
_journal_year                     ?
_journal_volume                   ?

_journal_issue                    ?
_journal_page_first               ?
_journal_page_last                ?

_journal_suppl_publ_number        ?
_journal_suppl_publ_pages         ?

# 3. Titl and Author List

_publ_section_title
; 
;

# 4. Text

_publ_section_abstract
;
?
;

_publ_section_comment
;
?
;

_publ_section_exptl_prep
;
?
;

_publ_section_exptl_refinement
;
?
;
_publ_section_references
;
Bruker (2008). <i>SADABS</i>. Bruker AXS Inc., Madison,
Wisconsin, USA.

Bruker (2009). SAINT+. Version 7.68. Program for Reduction of Data 
Collected on Bruker CCD Area Detector Diffractometer, Bruker AXS 
Inc., Madison, Wisconson, USA.

Bruker (2002). SMART. Program for Bruker CCD X-ray
Diffractometer Control. Bruker AXS Inc., Madison, Wisconson, USA.

Sheldrick, G. M. (2008). <i>J. Acta Cryst.</i> A<b>64</b>, 112--122.

Sheldrick, G. M. (2015). <i>J. Acta Cryst.</i> C<b>71</b>, 3--8.

Spek, A. L. (2009). <i>J. Acta Cryst.</i> D<b>65</b>, 148--155.

Spek, A. L. (2015). <i>J. Acta Cryst.</i> C<b>71</b>, 9--18.
;


_publ_section_figure_captions
;
?
;

_publ_section_table_legends
;
?
;


_publ_section_acknowledgements
;
?
;

data_mn3alc

_vrf_PLAT088_mn3alc
;
PROBLEM: Poor Data / Parameter Ratio ....................6.29
RESPONSE: Intensity data were collected up to high resolution 
(sin(theta)/lambda = 0.8 A-1) and are complete. The low ratio 
between data and parameters is due to the (unavoidable) site 
occupancy refinement.
;

_audit_creation_method            'SHELXL-2014/7'
_shelx_SHELXL_version_number      '2014/7'
_chemical_name_systematic         ?
_chemical_name_common             'kappa manganese aluminum carbide'
_chemical_melting_point           ?
_chemical_formula_moiety          ?
_chemical_formula_sum
 'C0.97 Al0.89 Mn3.11' 
_chemical_formula_weight          206.53

loop_
 _atom_type_symbol
 _atom_type_description
 _atom_type_scat_dispersion_real
 _atom_type_scat_dispersion_imag
 _atom_type_scat_source
 'C'  'C'   0.0033   0.0016
 'International Tables Vol C Tables 4.2.6.8 and 6.1.1.4'
 'Al'  'Al'   0.0645   0.0514
 'International Tables Vol C Tables 4.2.6.8 and 6.1.1.4'
 'Mn'  'Mn'   0.3368   0.7283
 'International Tables Vol C Tables 4.2.6.8 and 6.1.1.4'
 
_space_group_crystal_system       cubic
_space_group_IT_number            221
_space_group_name_H-M_alt         'P m -3 m'
_space_group_name_Hall            '-P 4 2 3'
 
_shelx_space_group_comment
;
The symmetry employed for this shelxl refinement is uniquely defined
by the following loop, which should always be used as a source of
symmetry information in preference to the above space-group names.
They are only intended as comments.
;
 
loop_
 _space_group_symop_operation_xyz
 'x, y, z'
 '-x, -y, z'
 '-x, y, -z'
 'x, -y, -z'
 'z, x, y'
 'z, -x, -y'
 '-z, -x, y'
 '-z, x, -y'
 'y, z, x'
 '-y, z, -x'
 'y, -z, -x'
 '-y, -z, x'
 'y, x, -z'
 '-y, -x, -z'
 'y, -x, z'
 '-y, x, z'
 'x, z, -y'
 '-x, z, y'
 '-x, -z, -y'
 'x, -z, y'
 'z, y, -x'
 'z, -y, x'
 '-z, y, x'
 '-z, -y, -x'
 '-x, -y, -z'
 'x, y, -z'
 'x, -y, z'
 '-x, y, z'
 '-z, -x, -y'
 '-z, x, y'
 'z, x, -y'
 'z, -x, y'
 '-y, -z, -x'
 'y, -z, x'
 '-y, z, x'
 'y, z, -x'
 '-y, -x, z'
 'y, x, z'
 '-y, x, -z'
 'y, -x, -z'
 '-x, -z, y'
 'x, -z, -y'
 'x, z, y'
 '-x, z, -y'
 '-z, -y, x'
 '-z, y, -x'
 'z, -y, -x'
 'z, y, x'
 
_cell_length_a                    3.875(2)
_cell_length_b                    3.875(2)
_cell_length_c                    3.875(2)
_cell_angle_alpha                 90
_cell_angle_beta                  90
_cell_angle_gamma                 90
_cell_volume                      58.19(11)
_cell_formula_units_Z             1
_cell_measurement_temperature     293(2)
_cell_measurement_reflns_used     119
_cell_measurement_theta_min        5.26
_cell_measurement_theta_max       33.38
 
_exptl_crystal_description        'irregular'
_exptl_crystal_colour             'silver'
_exptl_crystal_density_meas       ?
_exptl_crystal_density_method     ?
_exptl_crystal_density_diffrn     5.894          
_exptl_crystal_F_000              95
_exptl_transmission_factor_min    ?
_exptl_transmission_factor_max    ?
_exptl_crystal_size_max           0.100
_exptl_crystal_size_mid           0.090
_exptl_crystal_size_min           0.070
_exptl_absorpt_coefficient_mu     16.511
_shelx_estimated_absorpt_T_min    0.289
_shelx_estimated_absorpt_T_max    0.391
_exptl_absorpt_correction_type    multi-scan 
_exptl_absorpt_process_details    SADABS 
_exptl_absorpt_correction_T_min   0.416  
_exptl_absorpt_correction_T_max   0.747
_exptl_absorpt_special_details    ?
_diffrn_ambient_temperature       293(2)
_diffrn_radiation_wavelength      0.71073
_diffrn_radiation_type            MoK\a
_diffrn_radiation_source         'Incoatec microsource'
_diffrn_radiation_monochromator  'multilayer optics'
_diffrn_measurement_device_type  'Bruker D8 gonimeter with APEX CCD detector'
_diffrn_measurement_method       '\w scans'
_diffrn_detector_area_resol_mean  ?
_diffrn_reflns_number             615
_diffrn_reflns_av_unetI/netI      0.0126
_diffrn_reflns_av_R_equivalents   0.0315
_diffrn_reflns_limit_h_min        -6
_diffrn_reflns_limit_h_max        5
_diffrn_reflns_limit_k_min        -3
_diffrn_reflns_limit_k_max        6
_diffrn_reflns_limit_l_min        -6
_diffrn_reflns_limit_l_max        5
_diffrn_reflns_theta_min          5.262
_diffrn_reflns_theta_max          34.425
_diffrn_reflns_theta_full         25.242
_diffrn_measured_fraction_theta_max   1.000
_diffrn_measured_fraction_theta_full  1.000
_diffrn_reflns_Laue_measured_fraction_max    1.000
_diffrn_reflns_Laue_measured_fraction_full   1.000
_diffrn_reflns_point_group_measured_fraction_max   1.000
_diffrn_reflns_point_group_measured_fraction_full  1.000
_reflns_number_total              44
_reflns_number_gt                 43
_reflns_threshold_expression      'I > 2\s(I)'
_reflns_Friedel_coverage          0.000
_reflns_Friedel_fraction_max      .
_reflns_Friedel_fraction_full     .
 
_reflns_special_details
;
 Reflections were merged by SHELXL according to the crystal
 class for the calculation of statistics and refinement.
 
 _reflns_Friedel_fraction is defined as the number of unique
 Friedel pairs measured divided by the number that would be
 possible theoretically, ignoring centric projections and
 systematic absences.
;
 
_computing_data_collection       'SMART (Bruker, 2002)'
_computing_cell_refinement       'SAINT (Bruker, 2009)'
_computing_data_reduction        'SAINT (Bruker, 2009)'
_computing_molecular_graphics    'PLATON (Spek, 2009)'
_computing_structure_solution     'SHELXS97 (Sheldrick, 2008)' 
_computing_structure_refinement   'SHELXL-2014/7 (Sheldrick, 2014)' 
_computing_publication_material   'SHELXL-2014/7 (Sheldrick, 2014)' 
_refine_special_details           ?
_refine_ls_structure_factor_coef  Fsqd
_refine_ls_matrix_type            full
_refine_ls_weighting_scheme       calc
_refine_ls_weighting_details
'w=1/[\s^2^(Fo^2^)+(0.0356P)^2^] where P=(Fo^2^+2Fc^2^)/3'
_atom_sites_solution_primary      ?
_atom_sites_solution_secondary    ?
_atom_sites_solution_hydrogens    .
_refine_ls_hydrogen_treatment     undef
_refine_ls_extinction_method      none
_refine_ls_extinction_coef        .
_refine_ls_number_reflns          44
_refine_ls_number_parameters      7
_refine_ls_number_restraints      0
_refine_ls_R_factor_all           0.0214
_refine_ls_R_factor_gt            0.0212
_refine_ls_wR_factor_ref          0.0552
_refine_ls_wR_factor_gt           0.0552
_refine_ls_goodness_of_fit_ref    1.095
_refine_ls_restrained_S_all       1.095
_refine_ls_shift/su_max           0.000
_refine_ls_shift/su_mean          0.000
 
loop_
 _atom_site_label
 _atom_site_type_symbol
 _atom_site_fract_x
 _atom_site_fract_y
 _atom_site_fract_z
 _atom_site_U_iso_or_equiv
 _atom_site_adp_type
 _atom_site_occupancy
 _atom_site_site_symmetry_order  
 _atom_site_calc_flag
 _atom_site_refinement_flags_posn
 _atom_site_refinement_flags_adp
 _atom_site_refinement_flags_occupancy
 _atom_site_disorder_assembly
 _atom_site_disorder_group
Mn1 Mn 0.5000 0.0000 0.5000 0.0074(4) Uani 1 16 d S T P . .
Al Al 0.0000 0.0000 0.0000 0.0079(8) Uiso 0.891(15) 48 d S U P . .
Mn2 Mn 0.0000 0.0000 0.0000 0.0079(8) Uiso 0.109(15) 48 d S U P . .
C C 0.5000 0.5000 0.5000 0.009(2) Uiso 0.97(4) 48 d S . P . .
 
loop_
 _atom_site_aniso_label
 _atom_site_aniso_U_11
 _atom_site_aniso_U_22
 _atom_site_aniso_U_33
 _atom_site_aniso_U_23
 _atom_site_aniso_U_13
 _atom_site_aniso_U_12
Mn1 0.0079(4) 0.0064(4) 0.0079(4) 0.000 0.000 0.000
 
_geom_special_details
;
 All esds (except the esd in the dihedral angle between two l.s. planes)
 are estimated using the full covariance matrix.  The cell esds are taken
 into account individually in the estimation of esds in distances, angles
 and torsion angles; correlations between esds in cell parameters are only
 used when they are defined by crystal symmetry.  An approximate (isotropic)
 treatment of cell esds is used for estimating esds involving l.s. planes.
;
 
loop_
 _geom_bond_atom_site_label_1
 _geom_bond_atom_site_label_2
 _geom_bond_distance
 _geom_bond_site_symmetry_2
 _geom_bond_publ_flag
Mn1 C 1.9375(12) 1_545 ?
Mn1 C 1.9375(12) . ?
Mn1 Al 2.7400(17) . ?
Mn1 Mn2 2.7400(17) . ?
Mn1 Mn1 2.7400(17) 5_545 ?
Mn1 Mn2 2.7400(17) 1_656 ?
Mn1 Al 2.7400(17) 1_656 ?
Mn1 Mn1 2.7400(17) 5_556 ?
Mn1 Mn1 2.7400(17) 9_545 ?
Mn1 Mn1 2.7400(17) 9_655 ?
Mn1 Mn1 2.7400(17) 5 ?
Mn1 Mn1 2.7400(17) 9 ?
Al Mn1 2.7400(17) 9 ?
Al Mn1 2.7400(17) 1_454 ?
Al Mn1 2.7400(17) 9_544 ?
Al Mn1 2.7400(17) 5 ?
Al Mn1 2.7400(17) 5_445 ?
Al Mn1 2.7400(17) 1_554 ?
Al Mn1 2.7400(17) 5_455 ?
Al Mn1 2.7400(17) 5_545 ?
Al Mn1 2.7400(17) 1_455 ?
Al Mn1 2.7400(17) 9_554 ?
Al Mn1 2.7400(17) 9_545 ?
Mn2 Mn1 2.7400(17) 9 ?
Mn2 Mn1 2.7400(17) 1_454 ?
Mn2 Mn1 2.7400(17) 9_544 ?
Mn2 Mn1 2.7400(17) 5 ?
Mn2 Mn1 2.7400(17) 5_445 ?
Mn2 Mn1 2.7400(17) 1_554 ?
Mn2 Mn1 2.7400(17) 5_455 ?
Mn2 Mn1 2.7400(17) 5_545 ?
Mn2 Mn1 2.7400(17) 1_455 ?
Mn2 Mn1 2.7400(17) 9_554 ?
Mn2 Mn1 2.7400(17) 9_545 ?
C Mn1 1.9375(12) 9_655 ?
C Mn1 1.9375(12) 1_565 ?
C Mn1 1.9375(12) 5 ?
C Mn1 1.9375(12) 5_556 ?
C Mn1 1.9375(12) 9 ?
 
loop_
 _geom_angle_atom_site_label_1
 _geom_angle_atom_site_label_2
 _geom_angle_atom_site_label_3
 _geom_angle
 _geom_angle_site_symmetry_1
 _geom_angle_site_symmetry_3
 _geom_angle_publ_flag
C Mn1 C 180.0 1_545 . ?
C Mn1 Al 90.0 1_545 . ?
C Mn1 Al 90.0 . . ?
C Mn1 Mn2 90.0 1_545 . ?
C Mn1 Mn2 90.0 . . ?
Al Mn1 Mn2 0.0 . . ?
C Mn1 Mn1 45.0 1_545 5_545 ?
C Mn1 Mn1 135.0 . 5_545 ?
Al Mn1 Mn1 60.0 . 5_545 ?
Mn2 Mn1 Mn1 60.0 . 5_545 ?
C Mn1 Mn2 90.0 1_545 1_656 ?
C Mn1 Mn2 90.0 . 1_656 ?
Al Mn1 Mn2 180.0 . 1_656 ?
Mn2 Mn1 Mn2 180.0 . 1_656 ?
Mn1 Mn1 Mn2 120.0 5_545 1_656 ?
C Mn1 Al 90.0 1_545 1_656 ?
C Mn1 Al 90.0 . 1_656 ?
Al Mn1 Al 180.0 . 1_656 ?
Mn2 Mn1 Al 180.0 . 1_656 ?
Mn1 Mn1 Al 120.0 5_545 1_656 ?
Mn2 Mn1 Al 0.0 1_656 1_656 ?
C Mn1 Mn1 135.0 1_545 5_556 ?
C Mn1 Mn1 45.0 . 5_556 ?
Al Mn1 Mn1 120.0 . 5_556 ?
Mn2 Mn1 Mn1 120.0 . 5_556 ?
Mn1 Mn1 Mn1 180.0 5_545 5_556 ?
Mn2 Mn1 Mn1 60.0 1_656 5_556 ?
Al Mn1 Mn1 60.0 1_656 5_556 ?
C Mn1 Mn1 45.0 1_545 9_545 ?
C Mn1 Mn1 135.0 . 9_545 ?
Al Mn1 Mn1 60.0 . 9_545 ?
Mn2 Mn1 Mn1 60.0 . 9_545 ?
Mn1 Mn1 Mn1 60.0 5_545 9_545 ?
Mn2 Mn1 Mn1 120.0 1_656 9_545 ?
Al Mn1 Mn1 120.0 1_656 9_545 ?
Mn1 Mn1 Mn1 120.0 5_556 9_545 ?
C Mn1 Mn1 135.0 1_545 9_655 ?
C Mn1 Mn1 45.0 . 9_655 ?
Al Mn1 Mn1 120.0 . 9_655 ?
Mn2 Mn1 Mn1 120.0 . 9_655 ?
Mn1 Mn1 Mn1 120.0 5_545 9_655 ?
Mn2 Mn1 Mn1 60.0 1_656 9_655 ?
Al Mn1 Mn1 60.0 1_656 9_655 ?
Mn1 Mn1 Mn1 60.0 5_556 9_655 ?
Mn1 Mn1 Mn1 180.0 9_545 9_655 ?
C Mn1 Mn1 135.0 1_545 5 ?
C Mn1 Mn1 45.0 . 5 ?
Al Mn1 Mn1 60.0 . 5 ?
Mn2 Mn1 Mn1 60.0 . 5 ?
Mn1 Mn1 Mn1 90.0 5_545 5 ?
Mn2 Mn1 Mn1 120.0 1_656 5 ?
Al Mn1 Mn1 120.0 1_656 5 ?
Mn1 Mn1 Mn1 90.0 5_556 5 ?
Mn1 Mn1 Mn1 120.0 9_545 5 ?
Mn1 Mn1 Mn1 60.0 9_655 5 ?
C Mn1 Mn1 135.0 1_545 9 ?
C Mn1 Mn1 45.0 . 9 ?
Al Mn1 Mn1 60.0 . 9 ?
Mn2 Mn1 Mn1 60.0 . 9 ?
Mn1 Mn1 Mn1 120.0 5_545 9 ?
Mn2 Mn1 Mn1 120.0 1_656 9 ?
Al Mn1 Mn1 120.0 1_656 9 ?
Mn1 Mn1 Mn1 60.0 5_556 9 ?
Mn1 Mn1 Mn1 90.0 9_545 9 ?
Mn1 Mn1 Mn1 90.0 9_655 9 ?
Mn1 Mn1 Mn1 60.0 5 9 ?
Mn1 Al Mn1 60.0 9 . ?
Mn1 Al Mn1 120.0 9 1_454 ?
Mn1 Al Mn1 180.0 . 1_454 ?
Mn1 Al Mn1 180.0 9 9_544 ?
Mn1 Al Mn1 120.0 . 9_544 ?
Mn1 Al Mn1 60.0 1_454 9_544 ?
Mn1 Al Mn1 60.0 9 5 ?
Mn1 Al Mn1 60.0 . 5 ?
Mn1 Al Mn1 120.0 1_454 5 ?
Mn1 Al Mn1 120.0 9_544 5 ?
Mn1 Al Mn1 120.0 9 5_445 ?
Mn1 Al Mn1 120.0 . 5_445 ?
Mn1 Al Mn1 60.0 1_454 5_445 ?
Mn1 Al Mn1 60.0 9_544 5_445 ?
Mn1 Al Mn1 180.0 5 5_445 ?
Mn1 Al Mn1 120.0 9 1_554 ?
Mn1 Al Mn1 90.0 . 1_554 ?
Mn1 Al Mn1 90.0 1_454 1_554 ?
Mn1 Al Mn1 60.0 9_544 1_554 ?
Mn1 Al Mn1 60.0 5 1_554 ?
Mn1 Al Mn1 120.0 5_445 1_554 ?
Mn1 Al Mn1 60.0 9 5_455 ?
Mn1 Al Mn1 120.0 . 5_455 ?
Mn1 Al Mn1 60.0 1_454 5_455 ?
Mn1 Al Mn1 120.0 9_544 5_455 ?
Mn1 Al Mn1 90.0 5 5_455 ?
Mn1 Al Mn1 90.0 5_445 5_455 ?
Mn1 Al Mn1 120.0 1_554 5_455 ?
Mn1 Al Mn1 120.0 9 5_545 ?
Mn1 Al Mn1 60.0 . 5_545 ?
Mn1 Al Mn1 120.0 1_454 5_545 ?
Mn1 Al Mn1 60.0 9_544 5_545 ?
Mn1 Al Mn1 90.0 5 5_545 ?
Mn1 Al Mn1 90.0 5_445 5_545 ?
Mn1 Al Mn1 60.0 1_554 5_545 ?
Mn1 Al Mn1 180.0 5_455 5_545 ?
Mn1 Al Mn1 60.0 9 1_455 ?
Mn1 Al Mn1 90.0 . 1_455 ?
Mn1 Al Mn1 90.0 1_454 1_455 ?
Mn1 Al Mn1 120.0 9_544 1_455 ?
Mn1 Al Mn1 120.0 5 1_455 ?
Mn1 Al Mn1 60.0 5_445 1_455 ?
Mn1 Al Mn1 180.0 1_554 1_455 ?
Mn1 Al Mn1 60.0 5_455 1_455 ?
Mn1 Al Mn1 120.0 5_545 1_455 ?
Mn1 Al Mn1 90.0 9 9_554 ?
Mn1 Al Mn1 120.0 . 9_554 ?
Mn1 Al Mn1 60.0 1_454 9_554 ?
Mn1 Al Mn1 90.0 9_544 9_554 ?
Mn1 Al Mn1 60.0 5 9_554 ?
Mn1 Al Mn1 120.0 5_445 9_554 ?
Mn1 Al Mn1 60.0 1_554 9_554 ?
Mn1 Al Mn1 60.0 5_455 9_554 ?
Mn1 Al Mn1 120.0 5_545 9_554 ?
Mn1 Al Mn1 120.0 1_455 9_554 ?
Mn1 Al Mn1 90.0 9 9_545 ?
Mn1 Al Mn1 60.0 . 9_545 ?
Mn1 Al Mn1 120.0 1_454 9_545 ?
Mn1 Al Mn1 90.0 9_544 9_545 ?
Mn1 Al Mn1 120.0 5 9_545 ?
Mn1 Al Mn1 60.0 5_445 9_545 ?
Mn1 Al Mn1 120.0 1_554 9_545 ?
Mn1 Al Mn1 120.0 5_455 9_545 ?
Mn1 Al Mn1 60.0 5_545 9_545 ?
Mn1 Al Mn1 60.0 1_455 9_545 ?
Mn1 Al Mn1 180.0 9_554 9_545 ?
Mn1 Mn2 Mn1 60.0 9 . ?
Mn1 Mn2 Mn1 120.0 9 1_454 ?
Mn1 Mn2 Mn1 180.0 . 1_454 ?
Mn1 Mn2 Mn1 180.0 9 9_544 ?
Mn1 Mn2 Mn1 120.0 . 9_544 ?
Mn1 Mn2 Mn1 60.0 1_454 9_544 ?
Mn1 Mn2 Mn1 60.0 9 5 ?
Mn1 Mn2 Mn1 60.0 . 5 ?
Mn1 Mn2 Mn1 120.0 1_454 5 ?
Mn1 Mn2 Mn1 120.0 9_544 5 ?
Mn1 Mn2 Mn1 120.0 9 5_445 ?
Mn1 Mn2 Mn1 120.0 . 5_445 ?
Mn1 Mn2 Mn1 60.0 1_454 5_445 ?
Mn1 Mn2 Mn1 60.0 9_544 5_445 ?
Mn1 Mn2 Mn1 180.0 5 5_445 ?
Mn1 Mn2 Mn1 120.0 9 1_554 ?
Mn1 Mn2 Mn1 90.0 . 1_554 ?
Mn1 Mn2 Mn1 90.0 1_454 1_554 ?
Mn1 Mn2 Mn1 60.0 9_544 1_554 ?
Mn1 Mn2 Mn1 60.0 5 1_554 ?
Mn1 Mn2 Mn1 120.0 5_445 1_554 ?
Mn1 Mn2 Mn1 60.0 9 5_455 ?
Mn1 Mn2 Mn1 120.0 . 5_455 ?
Mn1 Mn2 Mn1 60.0 1_454 5_455 ?
Mn1 Mn2 Mn1 120.0 9_544 5_455 ?
Mn1 Mn2 Mn1 90.0 5 5_455 ?
Mn1 Mn2 Mn1 90.0 5_445 5_455 ?
Mn1 Mn2 Mn1 120.0 1_554 5_455 ?
Mn1 Mn2 Mn1 120.0 9 5_545 ?
Mn1 Mn2 Mn1 60.0 . 5_545 ?
Mn1 Mn2 Mn1 120.0 1_454 5_545 ?
Mn1 Mn2 Mn1 60.0 9_544 5_545 ?
Mn1 Mn2 Mn1 90.0 5 5_545 ?
Mn1 Mn2 Mn1 90.0 5_445 5_545 ?
Mn1 Mn2 Mn1 60.0 1_554 5_545 ?
Mn1 Mn2 Mn1 180.0 5_455 5_545 ?
Mn1 Mn2 Mn1 60.0 9 1_455 ?
Mn1 Mn2 Mn1 90.0 . 1_455 ?
Mn1 Mn2 Mn1 90.0 1_454 1_455 ?
Mn1 Mn2 Mn1 120.0 9_544 1_455 ?
Mn1 Mn2 Mn1 120.0 5 1_455 ?
Mn1 Mn2 Mn1 60.0 5_445 1_455 ?
Mn1 Mn2 Mn1 180.0 1_554 1_455 ?
Mn1 Mn2 Mn1 60.0 5_455 1_455 ?
Mn1 Mn2 Mn1 120.0 5_545 1_455 ?
Mn1 Mn2 Mn1 90.0 9 9_554 ?
Mn1 Mn2 Mn1 120.0 . 9_554 ?
Mn1 Mn2 Mn1 60.0 1_454 9_554 ?
Mn1 Mn2 Mn1 90.0 9_544 9_554 ?
Mn1 Mn2 Mn1 60.0 5 9_554 ?
Mn1 Mn2 Mn1 120.0 5_445 9_554 ?
Mn1 Mn2 Mn1 60.0 1_554 9_554 ?
Mn1 Mn2 Mn1 60.0 5_455 9_554 ?
Mn1 Mn2 Mn1 120.0 5_545 9_554 ?
Mn1 Mn2 Mn1 120.0 1_455 9_554 ?
Mn1 Mn2 Mn1 90.0 9 9_545 ?
Mn1 Mn2 Mn1 60.0 . 9_545 ?
Mn1 Mn2 Mn1 120.0 1_454 9_545 ?
Mn1 Mn2 Mn1 90.0 9_544 9_545 ?
Mn1 Mn2 Mn1 120.0 5 9_545 ?
Mn1 Mn2 Mn1 60.0 5_445 9_545 ?
Mn1 Mn2 Mn1 120.0 1_554 9_545 ?
Mn1 Mn2 Mn1 120.0 5_455 9_545 ?
Mn1 Mn2 Mn1 60.0 5_545 9_545 ?
Mn1 Mn2 Mn1 60.0 1_455 9_545 ?
Mn1 Mn2 Mn1 180.0 9_554 9_545 ?
Mn1 C Mn1 90.0 9_655 . ?
Mn1 C Mn1 90.0 9_655 1_565 ?
Mn1 C Mn1 180.0 . 1_565 ?
Mn1 C Mn1 90.0 9_655 5 ?
Mn1 C Mn1 90.0 . 5 ?
Mn1 C Mn1 90.0 1_565 5 ?
Mn1 C Mn1 90.0 9_655 5_556 ?
Mn1 C Mn1 90.0 . 5_556 ?
Mn1 C Mn1 90.0 1_565 5_556 ?
Mn1 C Mn1 180.0 5 5_556 ?
Mn1 C Mn1 180.0 9_655 9 ?
Mn1 C Mn1 90.0 . 9 ?
Mn1 C Mn1 90.0 1_565 9 ?
Mn1 C Mn1 90.0 5 9 ?
Mn1 C Mn1 90.0 5_556 9 ?
 
_refine_diff_density_max    0.557
_refine_diff_density_min   -0.561
_refine_diff_density_rms    0.189

_shelx_res_file
;

    mn3alc.res created by SHELXL-2014/7

TITL Mn3AlC in Pm-3m
CELL  0.71073   3.8750   3.8750   3.8750   90.000   90.000   90.000
ZERR     1.00   0.0024   0.0024   0.0024    0.000    0.000    0.000
LATT   1
SYMM  - X, - Y,   Z
SYMM  - X,   Y, - Z
SYMM    X, - Y, - Z
SYMM    Z,   X,   Y
SYMM    Z, - X, - Y
SYMM  - Z, - X,   Y
SYMM  - Z,   X, - Y
SYMM    Y,   Z,   X
SYMM  - Y,   Z, - X
SYMM    Y, - Z, - X
SYMM  - Y, - Z,   X
SYMM    Y,   X, - Z
SYMM  - Y, - X, - Z
SYMM    Y, - X,   Z
SYMM  - Y,   X,   Z
SYMM    X,   Z, - Y
SYMM  - X,   Z,   Y
SYMM  - X, - Z, - Y
SYMM    X, - Z,   Y
SYMM    Z,   Y, - X
SYMM    Z, - Y,   X
SYMM  - Z,   Y,   X
SYMM  - Z, - Y, - X
SFAC  C    AL   MN
UNIT  0.97    0.89    3.11
MERG   2
FMAP   2
PLAN   20
TEMP 20
BOND
SIZE 0.10 0.09 0.07
L.S.   10
ACTA
WGHT    0.035600
FVAR       0.51729   0.89076   0.96753   0.00792
MN1   3    0.500000    0.000000    0.500000    10.06250    0.00793    0.00639 =
         0.00793    0.00000    0.00000    0.00000
AL    2    0.000000    0.000000    0.000000    20.02083   41.00000
MN2   3    0.000000    0.000000    0.000000   -20.02083   41.00000
C     1    0.500000    0.500000    0.500000    30.02083    0.00867
HKLF    4

REM  Mn3AlC in Pm-3m
REM R1 =  0.0212 for      43 Fo > 4sig(Fo)  and  0.0214 for all      44 data
REM      7 parameters refined using      0 restraints

END

WGHT      0.0339      0.0000

REM Highest difference peak  0.557,  deepest hole -0.561,  1-sigma level  0.189
Q1    1   0.3200  0.1906  0.3200  10.50000  0.05    0.56
Q2    1   0.3300  0.5000  0.3300  10.25000  0.05    0.48
Q3    1   0.5000  0.0000  0.3094  10.25000  0.05    0.30
Q4    1   0.1694  0.1694  0.1694  10.16667  0.05    0.29
Q5    1   0.0000  0.1969  0.2867  10.50000  0.05    0.28
Q6    1   0.3032  0.3032  0.4108  10.50000  0.05    0.25
Q7    1   0.5000  0.1659  0.1659  10.25000  0.05    0.23
Q8    1   0.2914  0.5000  0.5000  10.12500  0.05    0.03
;
_shelx_res_checksum   22114

_shelx_hkl_file
;
  -1   0   0   57.98    1.60
   0   0   1   58.28    2.05
   0   0   1   57.96    1.82
  -1  -1   0    7.04    0.82
  -1   0   1    6.76    0.91
  -1   0   1    8.81    0.75
  -1   1   0    9.12    1.24
   0   1  -1    8.79    1.06
   0   1   1    8.21    1.17
   0   1   1    6.07    0.96
   1   0  -1    5.20    0.86
   1   0   1    8.09    0.95
   1   1   0    4.84    1.12
  -1  -1  -1  992.16   15.41
   1   1  -1  977.27   18.11
  -1   1   1  968.34   17.43
  -1   1   1  978.79   17.46
  -1   1  -1 1000.00   16.89
   1   1   1  955.02   18.10
  -2   0   0  960.06   16.37
  -2   0   0  950.81   16.01
   0   0   2  972.98   17.93
   0   2   0  979.28   17.28
   0   2   0  991.41   16.96
   2   0   0  920.72   18.37
   0   2   1   24.21    2.03
   1   0  -2   20.20    2.12
   1   0   2   25.62    2.11
   2   1   0   31.51    3.15
   0   2   1   25.37    2.20
   0   2  -1   31.46    2.32
   0   2  -1   21.90    1.96
  -1   0   2   24.99    2.03
  -2   1   0   22.67    2.12
  -2  -1   0   22.60    1.76
   1   2   0   22.19    1.40
   2   0  -1   22.54    2.19
   2   0   1   21.96    1.85
   1   2   0   20.47    2.21
   0   1   2   24.74    1.91
   0   1   2   23.84    2.32
  -1   2   0   20.99    2.21
   0   1  -2   25.73    2.01
  -1   2   0   21.82    1.31
  -2   0  -1   25.11    1.19
  -2   0  -1   23.32    1.43
  -2   0   1   23.53    1.82
  -2   0   1   24.98    1.74
  -2  -1  -1    7.03    1.03
   1   2  -1    3.94    1.41
   1   1  -2    5.66    1.32
  -2   1   1    7.80    1.55
  -2   1   1    6.75    0.89
  -1  -2  -1    4.92    0.72
  -1  -1  -2    6.18    0.69
  -1   2   1    5.52    1.10
  -1   1   2    8.61    1.57
  -1   1   2    5.48    1.21
   2   1  -1    5.76    1.77
  -1   2   1    4.03    1.25
  -1   1  -2    5.38    0.96
  -1   2  -1    4.47    1.02
   1   1   2    4.14    1.22
  -2  -1   1    3.89    0.89
   1   2   1    6.38    1.45
   1   2   1    4.20    0.85
   2  -1  -1    5.46    1.15
  -2   1  -1    6.09    0.99
   2   1   1    7.40    1.47
  -2  -2   0  653.44   11.99
  -2   0  -2  649.42   11.89
  -2   0   2  628.03   13.01
  -2   0   2  649.25   11.41
  -2   2   0  647.86   14.17
   0   2  -2  659.69   13.37
   0   2   2  641.69   14.48
   0   2   2  648.30   13.09
   2   0  -2  654.05   14.25
   2   0   2  657.85   13.37
   2   2   0  667.10   15.67
  -2  -2  -1   13.10    1.49
  -2  -1  -2   15.15    1.41
   2   1  -2   14.85    2.35
  -2   1   2   18.47    2.27
  -2   1   2   12.74    1.03
  -1   2   2   13.85    2.20
  -2   2   1   14.44    2.21
  -2   2   1   15.19    1.21
  -1  -2  -2   14.19    1.13
   1   2  -2   15.74    2.24
  -1   2   2   12.56    1.92
   2   2  -1   16.90    2.77
  -1   2  -2   16.16    2.12
   1   2   2   13.74    2.03
  -2   2  -1    9.10    1.46
   2  -1  -2   16.50    2.36
  -2   1  -2   12.51    1.46
   2   1   2   16.18    2.22
   1   2   2   13.85    1.38
   2   2   1   12.08    2.28
  -2  -2  -2  446.35    8.69
   2   2  -2  434.85   11.81
  -2   2   2  426.43   11.06
  -2   2  -2  436.10   10.36
   2   2   2  439.90   11.74
  -3   0   0   14.08    1.50
  -3   0   0   12.36    1.61
   0   0   3   12.86    2.11
   0   3   0   13.02    1.77
   0   3   0   12.04    1.99
   3   0   0    7.11    1.76
   0   3  -1    4.91    1.21
   0   3   1    3.18    1.23
   0   3   1    4.14    1.49
   1   0  -3    4.73    1.66
   1   0   3    5.59    1.59
   3   1   0    4.88    2.23
   0   3  -1    4.23    1.31
  -3  -1   0    1.96    1.07
  -3   1   0    2.85    1.16
  -3   1   0    3.31    0.96
   0   3   2    9.22    1.85
   2   0  -3   10.32    2.35
  -3  -2   0    7.65    1.39
  -3   2   0    9.78    2.00
  -2   0   3   11.30    1.82
   0   3  -2   11.34    1.84
   0   3  -2    9.01    1.80
   2   0   3    8.54    1.82
   3   2   0    6.30    2.74
   0   3   2    9.37    1.82
  -1   3   0    2.78    1.56
  -3   0   1    5.34    1.25
   0   1   3    7.03    1.84
  -3   0  -1    4.53    1.00
  -3   0   1    4.59    1.05
   0   1   3    4.90    1.17
   1   3   0    3.85    1.37
   1   3   0    4.13    1.30
   3   0  -1    6.77    2.09
   3   0   1    4.97    1.27
   0   1  -3    5.23    1.30
  -3  -1  -1  436.29    9.35
  -1   3   1  435.15   10.25
  -3   1   1  423.83   10.21
   1   3  -1  423.55   11.27
  -3   1   1  414.16    8.72
   1   1  -3  424.89   11.05
  -1   1   3  422.52   11.20
  -1   1   3  432.00   10.50
   1   3  -1  425.18    9.65
   3   1  -1  431.40   12.06
  -1   3   1  433.79   10.79
  -1   1  -3  427.17    9.78
  -3  -1   1  431.99    9.37
  -3   1  -1  421.14   10.18
  -1   3  -1  421.73   10.56
   1   3   1  434.15   11.47
   1   3   1  435.43    9.23
   3  -1  -1  416.33   10.42
   1   1   3  421.71   11.21
   3   1   1  421.57   10.93
   2   1  -3    2.59    1.63
   3   2  -1    1.30    1.82
  -3  -2  -1    2.13    0.96
   1   3  -2    2.99    1.02
   1   3  -2    0.94    1.10
  -3   2   1    1.75    1.39
  -3   2   1    2.99    0.90
  -2  -1  -3    0.85    0.49
  -1   3   2    2.20    1.11
  -1   3   2    3.71    1.56
  -2   1   3    1.76    1.03
  -3   2  -1    3.97    1.45
  -2   1  -3    3.55    0.92
   2  -1  -3    2.72    1.71
  -3  -2   1    2.97    1.10
   3   2   1    1.24    1.70
   1   3   2    2.79    1.31
   2   1   3    3.20    1.66
  -1   3  -2    4.67    1.54
  -3   0   2    7.86    1.42
   3   0  -2    9.09    2.24
   2   3   0    6.29    1.89
  -3   0  -2    8.27    1.32
   3   0   2   12.11    1.72
  -3   0   2    8.30    1.30
   0   2   3    9.74    1.99
   0   2   3    9.45    1.63
   0   2  -3    9.12    1.77
  -2   3   0    9.99    2.18
  -1   2   3    2.37    1.21
  -3   1   2    1.47    1.02
   2   3  -1    4.67    1.94
  -1   2   3    3.22    1.36
  -2   3   1    2.74    1.55
   3   1  -2    3.87    1.78
  -3  -1  -2    2.85    0.88
   1   2  -3    3.35    1.60
  -2  -3  -1    2.26    0.62
  -2   3  -1    1.80    1.08
   3  -1  -2    1.36    1.73
   2   3   1    1.50    1.41
   3   1   2    2.78    1.34
   1   2   3    3.01    0.86
   1   2   3    0.62    1.46
  -3  -1   2    2.60    0.94
  -3   1  -2    2.08    0.75
  -3  -2  -2    7.74    1.32
   3   2  -2    6.77    2.09
  -3   2   2    5.84    1.84
  -2   3   2    6.93    2.14
  -2   2   3    7.20    1.91
   2   2  -3    5.03    1.88
   2   3  -2    6.32    1.99
  -2   2  -3    6.04    1.31
  -2   3  -2    4.33    1.34
   2   2   3   10.27    2.48
   2  -2  -3    8.30    2.15
   2   3   2    4.44    1.72
  -3   2  -2    6.87    1.37
   3   2   2    8.63    2.26
  -3  -3   0    2.11    0.86
  -3   0  -3    1.90    0.75
  -3   0   3    1.52    0.95
  -3   3   0    6.28    1.95
   0   3  -3    1.73    1.26
   0   3   3    3.09    1.27
   0   3   3    2.65    1.31
   3   0  -3    3.74    1.99
   3   3   0    0.51    2.03
  -3  -3  -1  224.99    6.36
  -3  -1  -3  227.66    6.39
  -3   1   3  230.57    7.58
   3   1  -3  234.42    8.96
  -3   3   1  231.70    8.54
   3   3  -1  232.22    9.70
  -1   3   3  225.66    8.53
  -1   3   3  224.82    7.87
   1   3  -3  227.92    8.35
   1   3   3  234.77    8.99
   3  -1  -3  223.70    8.79
  -3   3  -1  222.16    8.63
   3   1   3  231.04    8.40
  -1   3  -3  227.10    8.10
   3   3   1  230.20   10.13
  -2   3   3    0.97    1.59
  -3   2   3    0.60    1.01
   3   2  -3    0.42    1.68
  -3   3   2    0.82    1.18
   3   3  -2    2.31    1.49
  -2   3   3    2.46    1.18
   2   3  -3    0.74    1.47
  -3   2  -3    0.97    0.66
   2   3   3    0.59    1.49
   3  -2  -3    2.31    1.70
  -3   3  -2    1.07    0.95
   3   2   3    1.32    1.80
  -2   3  -3    1.28    0.88
   3   3   2    1.84    1.83
   3   3  -3  120.55    6.66
  -3   3   3  119.95    6.11
  -3   3  -3  122.24    5.63
   3   3   3  127.13    7.03
  -4   0   0  322.73    8.54
   0   0  -4  329.54    9.93
   0   4   0  333.97    9.37
   0   4   0  324.34   10.64
   0   4   1    7.74    1.60
   0   4   1    7.18    2.17
   1   0  -4   10.40    2.22
   1   0   4   13.20    2.69
   4   1   0    5.28    2.18
   0   4  -1    7.12    1.83
  -4   1   0    8.99    1.68
  -4  -1   0    8.72    1.88
   0   4   2  264.35    8.79
   0   4   2  248.73    8.77
   4   2   0  271.43   11.52
   2   0  -4  259.62    9.90
   2   0   4  266.16    8.99
  -4  -2   0  255.61    7.65
  -4   2   0  255.05    8.39
  -4   2   0  257.68    7.16
   0   4  -2  265.51    8.82
  -4  -3   0    6.87    1.37
  -4   3   0    4.67    1.85
  -4   3   0    5.22    1.49
  -3   0  -4    4.52    0.94
   0   4  -3    8.12    2.21
   3   0  -4    4.84    2.59
   4   3   0    5.32    3.15
   0   4   3    2.72    1.31
  -4   0   1   10.15    1.86
   0   1   4    7.72    2.32
  -1   4   0    7.50    2.51
   0   1  -4    8.39    1.76
   4   0  -1    4.97    1.97
  -4   0  -1    8.47    1.68
   1   4   0    7.36    1.91
   1   4  -1    0.53    0.91
  -4   1   1    2.03    1.17
   1   1  -4    3.29    1.52
  -1   1   4    0.57    1.13
  -4   1   1    0.59    0.92
   4   1  -1   -0.59    1.77
  -1   4   1    1.05    1.73
  -4  -1  -1    1.74    1.07
   1   4  -1    0.56    1.13
  -4  -1   1    2.27    1.27
   1  -1  -4    0.15    1.58
   4   1   1    2.23    1.52
   1   4   1    1.97    1.08
   1   1   4    1.47    1.80
  -1   1  -4    0.88    1.20
  -1   4  -1    0.50    1.33
  -4   1  -1    0.64    0.94
   2   1  -4    5.35    2.43
   1   4  -2    7.24    1.85
   1   4  -2    7.46    1.89
  -4  -2  -1    6.63    1.53
  -2   1   4    8.20    1.81
  -1   4   2    8.74    2.68
   4   2  -1    8.96    2.76
  -4   2   1    5.60    1.79
  -4   2  -1    5.96    1.51
  -4   2  -1    4.78    1.49
   2   1   4    9.50    2.46
   2  -1  -4    9.41    2.37
  -4  -2   1    7.63    1.66
   4   2   1    5.74    2.61
   1   4   2    4.24    1.59
  -1   4  -2    6.94    2.06
  -1   4   3    1.89    1.04
  -1   4   3    1.14    1.73
   3   1  -4    2.15    2.05
  -3   1   4    0.05    0.82
   1   4  -3    1.25    1.27
  -4  -3  -1    4.07    1.08
   4   3  -1    1.36    2.06
  -4   3   1   -1.65    1.13
   4   3   1    2.40    2.99
   3  -1  -4    1.02    1.67
  -1   4  -3    0.23    1.28
  -4   3  -1    0.45    1.20
   3   1   4    1.54    2.18
   1   4   3   -2.04    0.83
   0   2  -4  236.23    8.08
   2   4   0  246.50    9.25
  -4   0   2  242.60    6.60
  -2   4   0  243.82    9.47
   0   2   4  243.08    9.25
   0   2   4  237.07    7.66
  -4   0  -2  236.75    7.13
   1   2  -4    3.82    1.81
  -4   1   2    9.27    1.74
   4   1  -2    8.70    2.57
  -1   2   4    8.81    2.31
  -4  -1  -2    5.09    1.35
   2   4  -1    6.59    2.12
  -1   2   4    7.04    1.91
  -2   4   1    6.13    2.32
   4   1   2    3.91    2.20
  -2   4  -1    4.68    2.39
   2   4   1    6.31    2.04
  -4   1  -2    5.76    1.36
   1   2   4    8.45    2.41
  -4  -1   2    8.53    1.61
  -2   4   2  189.96    8.36
  -4   2   2  202.13    7.70
   2   2  -4  194.18    8.47
  -2   2   4  189.82    7.81
   4   2  -2  206.21    9.02
   2   4  -2  190.30    8.36
  -4  -2  -2  182.43    6.22
  -2   4  -2  176.35    7.92
   2   2   4  196.07    8.54
   4   2   2  192.82    8.40
   2   4   2  176.46    8.43
  -2   2  -4  188.88    7.04
   2  -2  -4  191.45    8.21
  -2   4   3    4.78    2.40
   3   2  -4    4.07    1.96
  -4  -3  -2    3.42    0.81
   2   4  -3    2.96    1.85
  -4   3   2    2.48    1.59
   4   3  -2    4.86    2.28
  -3   2   4    7.38    1.68
  -4   3  -2    3.81    1.68
  -2   4  -3    2.95    1.02
   3   2   4    3.14    2.58
  -3   2  -4    4.41    1.07
   4   3   2    3.79    2.84
   3  -2  -4    4.82    2.05
   2   4   3    6.15    1.74
   0   3   4    4.46    1.71
   0   3   4    5.34    1.84
   3   4   0    2.77    1.47
   4   0  -3   -0.60    1.84
  -3   4   0    3.35    1.78
   0   3  -4    7.43    2.11
  -4   0   3    4.99    1.24
  -4   0  -3    4.63    1.24
  -4  -1  -3    1.33    0.84
   3   4  -1    2.81    1.55
   1   3  -4    3.12    1.70
  -4   1   3    1.34    1.00
   4   1  -3    3.75    2.16
  -1   3   4    1.35    1.29
  -1   3   4    1.73    1.51
  -3   4   1    1.70    1.52
  -4   1  -3    1.92    0.70
  -3   4  -1   -1.05    1.08
   3   4   1   -0.63    1.30
   4  -1  -3    1.66    2.18
  -1   3  -4    1.36    0.91
   1   3   4    1.28    1.15
   4   2  -3    5.04    2.28
  -2   3   4    4.94    2.06
  -4  -2  -3    4.83    1.05
   3   4  -2    3.82    1.70
   2   3  -4    5.42    2.02
  -4   2   3    5.86    1.55
  -3   4   2    6.97    2.43
   2  -3  -4    1.86    2.37
   2   3   4    5.31    2.90
  -3   4  -2    4.37    1.69
   3   4   2    1.84    2.55
  -2   3  -4    4.27    1.29
   4   2   3    2.93    2.30
  -4   3   3    4.64    1.35
   4   3  -3    5.16    1.70
  -3   3   4    1.55    1.70
   3   4  -3    0.16    1.11
  -3   4   3    0.80    2.11
   3   3  -4   -0.07    1.03
   3   3   4    3.43    2.65
  -3   4  -3    0.51    0.69
   3   4   3   -2.34    1.81
  -3   3  -4    0.26    0.65
   4   3   3    3.11    2.71
  -4   0  -4  132.35    5.34
  -4   4   0  127.25    6.63
   0   4  -4  129.13    7.09
   0   4   4  134.28    6.92
   4   0  -4  133.36    8.35
   4   4   0  127.00   10.35
  -4   1   4    5.45    1.45
   4   1  -4    8.54    3.08
  -4   4   1    0.83    1.08
   1   4  -4    5.62    2.15
  -1   4   4    4.87    1.63
  -1   4   4    7.29    2.36
   4   4  -1    5.81    1.61
  -1   4  -4    3.96    2.17
   4  -1  -4    2.40    2.35
  -4   4  -1    3.78    1.44
   1   4   4    5.15    1.33
   4   4   1    5.82    3.73
  -4   2   4  115.42    5.93
   4   2  -4  101.98    8.51
  -4   4   2  107.36    6.53
   2   4  -4  111.58    6.38
  -2   4   4  110.40    6.34
   4   4  -2   94.36    6.29
  -2   4  -4  110.07    6.18
  -4   4  -2  114.61    6.36
   2   4   4   84.91    7.43
   4   4   2  100.38    9.60
  -5   0   0    6.13    2.01
   0   0  -5    4.23    1.93
   0   5   0    4.38    2.99
   0   5  -1    1.32    2.08
   1   0  -5   -0.18    1.09
  -5  -1   0    0.36    1.60
  -5   1   0    3.17    1.54
  -1   0  -5    1.31    1.90
  -5   2   0    4.66    1.79
   0   5  -2    4.56    2.00
   5   2   0    4.15    3.05
   2   0  -5    5.00    1.76
  -5  -2   0    5.68    1.28
   3   0  -5    1.47    2.11
   0   5   3    0.02    0.91
   5   3   0   -1.86    3.26
  -5  -3   0    2.93    0.80
   0   5  -3    2.30    1.99
   1   5   0    3.17    1.32
   0   1   5    5.14    2.34
  -5   0  -1    3.30    1.60
  -5   0   1    3.68    1.78
   0   1  -5    4.55    1.63
  -1   5   0   -1.33    2.21
  -5  -1  -1  138.25    6.01
   1   1  -5  149.69    7.41
   5   1  -1  144.21    8.24
  -1   5   1  147.77    8.27
  -5   1   1  146.42    5.95
  -5  -1   1  146.39    6.03
   1  -1  -5  143.34    7.42
  -1   5  -1  144.15    8.49
   1   1   5  136.26    7.79
   1   5   1  147.62    7.51
  -5   1  -1  148.29    6.10
  -5  -2  -1    2.87    1.00
   2   1  -5    0.15    1.53
   5   2  -1    1.32    2.59
  -1   5   2    3.20    2.95
  -5  -2   1    2.16    1.47
   5   2   1   -0.78    2.64
   2   1   5    2.30    2.53
   2  -1  -5   -0.09    1.71
  -1   5  -2    0.36    1.97
  -5   2  -1   -0.67    1.26
   1   5   2    2.25    1.32
   3   1  -5   86.80    8.08
  -5   3   1  109.33    5.71
  -5  -3  -1  102.26    4.61
  -1   5   3   78.65    7.56
   1   5  -3   90.15    5.86
   5   3  -1   89.13    7.96
   3  -1  -5   99.96    8.04
   5   3   1  105.63   10.42
   1   5   3   95.83    6.05
  -5   3  -1   95.08    5.30
  -1   5  -3  103.73    8.22
  -2   5   0    3.51    2.72
   0   2   5    4.04    2.63
   2   5   0    3.73    1.42
  -5   0  -2    4.65    1.25
  -5   0   2    5.45    1.71
   1   2  -5    0.75    1.51
  -5  -1  -2    0.17    0.78
  -2   5   1   -1.72    2.27
   2   5  -1    1.16    0.87
   5   1  -2   -2.32    2.16
  -1   2   5   -0.35    1.44
   1   2   5    2.22    2.45
   1  -2  -5   -0.16    2.25
  -5   1  -2    0.34    1.34
  -2   5  -1   -0.54    2.96
  -5  -1   2    1.56    1.36
   2   5   1    3.65    1.43
   5   2  -2    7.67    2.98
   2   5  -2    0.84    0.95
  -2   5   2    1.72    2.60
  -5  -2  -2    3.68    1.10
   2   2  -5    2.50    1.66
  -2   2   5    3.25    2.28
  -2   2  -5    5.47    1.03
  -2   5  -2    2.12    2.95
   2   2   5   -0.49    2.47
  -5   2  -2    3.62    1.74
   2   5   2    2.85    1.06
   2  -2  -5    5.15    2.45
  -5   3   2    0.78    0.93
  -3   2   5    1.29    0.84
  -2   5   3    2.43    2.56
   5   3  -2    1.61    1.85
  -5  -3  -2    1.76    0.63
   3   2  -5    3.26    2.08
  -2   5  -3    0.55    2.46
   3  -2  -5    1.46    2.02
   3   2   5    2.83    2.84
  -5   3  -2    1.20    1.40
   2   5   3    0.10    1.21
   5   3   2    2.88    3.73
  -5   0  -3    2.05    0.83
   0   3  -5    4.16    1.81
   0   3   5    1.13    1.06
   3   5   0    0.41    0.94
  -3   5   0   -1.73    1.00
  -1   3   5  101.43    6.11
  -3   5   1   78.93    7.40
   3   5  -1   84.29    5.66
  -5  -1  -3   96.86    4.76
   5   1  -3   94.27    8.39
  -1   3   5   97.55    5.99
  -3   5  -1   93.06    8.14
  -5   1  -3  105.54    5.06
  -1   3  -5   91.88    5.47
   3   5   1   96.96    6.47
   1   3   5   88.67    7.75
   2   3  -5    2.34    1.58
   3   5  -2    0.62    1.07
  -5  -2  -3    2.15    1.06
   5   2  -3   -3.59    1.72
  -2   3   5    1.69    1.93
  -5   2   3    4.18    1.06
  -3   5   2    0.63    2.69
   3   5   2   -0.19    1.17
  -3   5  -2    1.93    1.36
  -5   2  -3    1.54    0.82
  -2   3  -5    2.31    1.12
   2   3   5   -2.11    1.86
   2  -3  -5    1.91    2.75
  -6   0   0  113.05    6.13
   0   0  -6  111.51    6.50
   1   0  -6    6.32    1.90
  -1   0  -6    5.53    1.97
  -6   1   0    3.89    2.35
  -6  -1   0    5.70    2.14
   0   1  -6    4.39    1.59
   0  -1  -6    1.65    1.73
  -1   6   0    3.84    3.19
  -6   0   1    8.82    2.49
  -6   0  -1    3.22    2.01
  -6  -1  -1   -0.56    0.77
   1   1  -6    1.06    1.28
  -1   6   1    2.24    3.49
  -1  -1  -6   -0.12    2.04
  -1   6  -1   -0.78    3.00
  -6   1  -1    2.07    1.77
   1  -1  -6    0.03    1.30
  -6  -1   1    3.36    1.59
   0   0   0    0.00    0.00
;
_shelx_hkl_checksum   37725
